# Supplementary material for: Metabolomic Approach to Identify Potential Biomarkers in KRAS-Mutant Pancreatic Cancer Cells
Source: MDPI journal article supplement (doi:10.3390/biomedicines12040865), 2024-04-15
Supplement: s1 [file s1]

**Table S2.** Metabolites differentially identified in the treatment groups of vehicle and ML-SI1 (vehicle vs. ML-SI1-treated).

| Compound                                         | Log FC  | p                     | p (Corr)              | Regulation |
|--------------------------------------------------|---------|-----------------------|-----------------------|------------|
| C8 H19 N O6 S                                    | -20.141 | 1.23x10 <sup>-7</sup> | 9.04x10 <sup>-5</sup> | down       |
| C23 H2 N2 O20 S                                  | -19.532 | 1.43x10 <sup>-7</sup> | 1.72x10 <sup>-5</sup> | down       |
| C4 N O4 S                                        | -19.280 | 5.50x10 <sup>-7</sup> | 9.04x10 <sup>-5</sup> | down       |
| Tuberonic acid glucoside                         | -18.569 | 1.79x10 <sup>-7</sup> | 9.04x10 <sup>-5</sup> | down       |
| 5-Hydroxy-2,4-dioxopentanoate                    | -18.526 | 6.33x10 <sup>-8</sup> | 1.72x10 <sup>-5</sup> | down       |
| C10 H19 N O4                                     | -18.135 | 2.01x10 <sup>-7</sup> | 9.04x10 <sup>-5</sup> | down       |
| C3 H7 N3 O S                                     | -17.952 | 2.21x10 <sup>-7</sup> | 9.04x10 <sup>-5</sup> | down       |
| C39 H74 N10 O4                                   | -17.639 | 3.48x10 <sup>-7</sup> | 9.04x10 <sup>-5</sup> | down       |
| CDP-DG(16:0/16:0) Esi-7.596333                   | -17.634 | 1.57x10 <sup>-7</sup> | 1.72x10 <sup>-5</sup> | down       |
| 2-Ketobutyric acid                               | -17.387 | 8.40x10 <sup>-8</sup> | 1.72x10 <sup>-5</sup> | down       |
| C5 H5 N4 O3                                      | -17.239 | 2.69x10 <sup>-7</sup> | 9.04x10 <sup>-5</sup> | down       |
| 2-Furoic acid                                    | -17.195 | 9.58x10 <sup>-8</sup> | 1.72x10 <sup>-5</sup> | down       |
| Spermidine                                       | -17.192 | 3.30x10 <sup>-7</sup> | 9.04x10 <sup>-5</sup> | down       |
| C11 H15 O6                                       | -17.000 | 9.31x10 <sup>-8</sup> | 1.72x10 <sup>-5</sup> | down       |
| C9 H5 N3 O7                                      | -16.973 | 1.00x10 <sup>-7</sup> | 1.72x10 <sup>-5</sup> | down       |
| C7 H5 N O7                                       | -16.756 | 2.93x10 <sup>-7</sup> | 9.04x10 <sup>-5</sup> | down       |
| cyclic adenosine diphosphate ribose Esi-0.365    | -16.704 | 1.01x10 <sup>-7</sup> | 1.72x10 <sup>-5</sup> | down       |
| C22 H17 N9 O18 S                                 | -16.538 | 2.20x10 <sup>-7</sup> | 1.96x10 <sup>-5</sup> | down       |
| C7 H13 N5 O8                                     | -16.473 | 1.08x10 <sup>-7</sup> | 1.72x10 <sup>-5</sup> | down       |
| Lys-Trp-OH                                       | -16.404 | 3.21x10 <sup>-7</sup> | 9.04x10 <sup>-5</sup> | down       |
| C34 H21 N O16                                    | -16.363 | 1.15x10 <sup>-7</sup> | 1.72x10 <sup>-5</sup> | down       |
| C32 H59 N17 O3                                   | -16.362 | 3.96x10 <sup>-6</sup> | 1.30x10 <sup>-4</sup> | down       |
| C33 H21 O19                                      | -16.335 | 1.18x10 <sup>-7</sup> | 1.72x10 <sup>-5</sup> | down       |
| S-(Hydroxyphenylacetothiohydroximoyl)-L-cysteine | -16.309 | 4.53x10 <sup>-7</sup> | 9.04x10 <sup>-5</sup> | down       |
| C6 H8 Cl                                         | -15.875 | 4.45x10 <sup>-7</sup> | 9.04x10 <sup>-5</sup> | down       |
| C27 H45 O4                                       | -15.815 | 3.98x10 <sup>-7</sup> | 9.04x10 <sup>-5</sup> | down       |
| C26 H13 N2 O14                                   | -15.811 | 1.59x10 <sup>-7</sup> | 1.72x10 <sup>-5</sup> | down       |
| C9 H8 N O                                        | -15.810 | 5.38x10 <sup>-7</sup> | 9.04x10 <sup>-5</sup> | down       |
| C7 H14 N9 O                                      | -15.758 | 6.42x10 <sup>-7</sup> | 9.04x10 <sup>-5</sup> | down       |
| C6 H13 N4 O                                      | -15.648 | 7.03x10 <sup>-7</sup> | 9.04x10 <sup>-5</sup> | down       |
| Dihydroceramide C2                               | -15.630 | 4.95x10 <sup>-7</sup> | 9.04x10 <sup>-5</sup> | down       |
| C24 H31 N8 O                                     | -15.498 | 4.84x10 <sup>-7</sup> | 9.04x10 <sup>-5</sup> | down       |
| C17 H18 N12 O6 S                                 | -15.425 | 2.01x10 <sup>-7</sup> | 1.96x10 <sup>-5</sup> | down       |
| C27 H41 N7 O                                     | -15.403 | 4.49x10 <sup>-7</sup> | 9.04x10 <sup>-5</sup> | down       |
| 3-O-Methylisoproterenol Sulfate                  | -15.401 | 2.40x10 <sup>-7</sup> | 2.01x10 <sup>-5</sup> | down       |
| (Z)-N-(2-hydroxyethyl)hexadec-7-enamide          | -15.361 | 4.72x10 <sup>-7</sup> | 9.04x10 <sup>-5</sup> | down       |
| PG(20:0/18:0)                                    | -15.317 | 2.46x10 <sup>-6</sup> | 1.24x10 <sup>-4</sup> | down       |
| C6 H8 N O4                                       | -15.301 | 3.47x10 <sup>-7</sup> | 2.50x10 <sup>-5</sup> | down       |
| PE(O-18:1(9Z)/0:0)                               | -15.238 | 4.95x10 <sup>-7</sup> | 9.04x10 <sup>-5</sup> | down       |

|                                                                                                      |         |                       |                       |      |
|------------------------------------------------------------------------------------------------------|---------|-----------------------|-----------------------|------|
| C17 H24 N5 O12                                                                                       | -15.176 | 5.60x10 <sup>-7</sup> | 9.04x10 <sup>-5</sup> | down |
| PE(P-20:0/0:0)                                                                                       | -15.123 | 2.17x10 <sup>-7</sup> | 1.96x10 <sup>-5</sup> | down |
| C26 H9 N9 O15                                                                                        | -15.122 | 1.58x10 <sup>-7</sup> | 1.72x10 <sup>-5</sup> | down |
| Eicosanoyl-EA                                                                                        | -15.064 | 4.95x10 <sup>-7</sup> | 9.04x10 <sup>-5</sup> | down |
| C22 H19 N12 O13 S2                                                                                   | -15.041 | 2.98x10 <sup>-7</sup> | 2.37x10 <sup>-5</sup> | down |
| C17 H27 N5                                                                                           | -15.000 | 5.29x10 <sup>-7</sup> | 9.04x10 <sup>-5</sup> | down |
| C13 H27 N O                                                                                          | -14.972 | 6.01x10 <sup>-7</sup> | 9.04x10 <sup>-5</sup> | down |
| C16 H20 N7 O13 Esi+0.48499998                                                                        | -14.935 | 4.99x10 <sup>-7</sup> | 9.04x10 <sup>-5</sup> | down |
| C30 H47 N7 O3                                                                                        | -14.884 | 3.15x10 <sup>-7</sup> | 2.38x10 <sup>-5</sup> | down |
| C41 H79 N5 O3                                                                                        | -14.793 | 6.26x10 <sup>-7</sup> | 9.04x10 <sup>-5</sup> | down |
| MID42466:11?-(4-dimethylaminophenyl)-1?,25-dihydroxyvitamin D3 / 11?-(4-dimethylaminophenyl)-1?,25-d | -14.708 | 5.92x10 <sup>-7</sup> | 9.04x10 <sup>-5</sup> | down |
| C28 H49 N8 O3                                                                                        | -14.553 | 5.89x10 <sup>-7</sup> | 9.04x10 <sup>-5</sup> | down |
| C27 H52 N O                                                                                          | -14.392 | 7.36x10 <sup>-7</sup> | 9.04x10 <sup>-5</sup> | down |
| PS(15:1(9Z)/14:0)                                                                                    | -14.382 | 2.84x10 <sup>-6</sup> | 1.24x10 <sup>-4</sup> | down |
| C23 H41 N3 O3                                                                                        | -14.361 | 1.17x10 <sup>-6</sup> | 1.18x10 <sup>-4</sup> | down |
| C39 H70 N10 O3                                                                                       | -14.307 | 6.76x10 <sup>-7</sup> | 9.04x10 <sup>-5</sup> | down |
| C16 H27 N                                                                                            | -14.287 | 1.86x10 <sup>-6</sup> | 1.24x10 <sup>-4</sup> | down |
| C15 H25 N O                                                                                          | -13.965 | 9.49x10 <sup>-7</sup> | 1.03x10 <sup>-4</sup> | down |
| C15 H20 N7                                                                                           | -13.928 | 1.59x10 <sup>-6</sup> | 1.24x10 <sup>-4</sup> | down |
| C29 H53 N15 O2                                                                                       | -13.920 | 1.68x10 <sup>-6</sup> | 1.24x10 <sup>-4</sup> | down |
| C39 H53 N6                                                                                           | -13.805 | 7.18x10 <sup>-7</sup> | 9.04x10 <sup>-5</sup> | down |
| C26 H43 N2                                                                                           | -13.361 | 1.12x10 <sup>-4</sup> | 3.02x10 <sup>-3</sup> | down |
| C32 H19 N4 O15                                                                                       | -13.036 | 7.48x10 <sup>-5</sup> | 1.24x10 <sup>-3</sup> | down |
| C8 H11 N S4                                                                                          | -12.720 | 6.86x10 <sup>-5</sup> | 1.15x10 <sup>-3</sup> | down |
| Spermine                                                                                             | -4.191  | 8.25x10 <sup>-4</sup> | 2.08x10 <sup>-2</sup> | down |
| Costatol                                                                                             | -3.886  | 2.16x10 <sup>-4</sup> | 3.17x10 <sup>-3</sup> | down |
| Citric acid                                                                                          | -3.780  | 1.70x10 <sup>-4</sup> | 2.54x10 <sup>-3</sup> | down |
| C7 H15 N O3                                                                                          | -2.986  | 1.08x10 <sup>-4</sup> | 2.93x10 <sup>-3</sup> | down |
| C33 H20 N9 O12                                                                                       | -2.872  | 6.92x10 <sup>-4</sup> | 9.34x10 <sup>-3</sup> | down |
| C9 H15 N2 O7 S                                                                                       | -2.333  | 3.17x10 <sup>-4</sup> | 8.18x10 <sup>-3</sup> | down |
| C10 H9 N8 O5                                                                                         | -2.083  | 1.42x10 <sup>-3</sup> | 1.87x10 <sup>-2</sup> | down |
| Phosphocreatine                                                                                      | -1.990  | 1.22x10 <sup>-3</sup> | 2.95x10 <sup>-2</sup> | down |
| C13 H20 N3 O6                                                                                        | -1.968  | 1.09x10 <sup>-3</sup> | 2.69x10 <sup>-2</sup> | down |
| C7 H19 N3 O5 S                                                                                       | -1.946  | 7.93x10 <sup>-4</sup> | 2.00x10 <sup>-2</sup> | down |
| C12 H13 N3 O5                                                                                        | -1.874  | 1.28x10 <sup>-3</sup> | 3.07x10 <sup>-2</sup> | down |
| C16 H20 N7 O13                                                                                       | -1.849  | 1.43x10 <sup>-3</sup> | 3.37x10 <sup>-2</sup> | down |
| C8 H15 N5 O5 S                                                                                       | -1.821  | 2.31x10 <sup>-3</sup> | 2.99x10 <sup>-2</sup> | down |
| PE(P-20:0/0:0)                                                                                       | -1.569  | 1.91x10 <sup>-3</sup> | 4.49x10 <sup>-2</sup> | down |
| C30 H49 O7                                                                                           | 1.651   | 1.75x10 <sup>-3</sup> | 4.12x10 <sup>-2</sup> | up   |
| PE(18:0/0:0)                                                                                         | 1.686   | 1.38x10 <sup>-3</sup> | 3.27x10 <sup>-2</sup> | up   |
| Glycerophospho-N-Oleoyl Ethanolamine                                                                 | 1.716   | 3.16x10 <sup>-3</sup> | 4.01x10 <sup>-2</sup> | up   |
| Glycerophospho-N-Oleoyl Ethanolamine                                                                 | 1.728   | 1.22x10 <sup>-3</sup> | 2.95x10 <sup>-2</sup> | up   |
| PE(18:0/0:0)                                                                                         | 1.866   | 2.65x10 <sup>-3</sup> | 3.39x10 <sup>-2</sup> | up   |

|                                       |        |                       |                       |    |
|---------------------------------------|--------|-----------------------|-----------------------|----|
| Pyrroline hydroxycarboxylic acid      | 1.935  | 2.01x10 <sup>-3</sup> | 4.69x10 <sup>-2</sup> | up |
| PS(21:0/0:0)                          | 2.031  | 1.72x10 <sup>-3</sup> | 2.24x10 <sup>-2</sup> | up |
| PE(19:1(9Z)/0:0)                      | 2.085  | 1.01x10 <sup>-3</sup> | 2.53x10 <sup>-2</sup> | up |
| C16 H41 N16 O4                        | 2.246  | 4.08x10 <sup>-4</sup> | 1.05x10 <sup>-2</sup> | up |
| Adenosine5'-monophosphate             | 2.331  | 4.87x10 <sup>-4</sup> | 1.24x10 <sup>-2</sup> | up |
| C32 H53 O7                            | 2.370  | 5.09x10 <sup>-4</sup> | 1.29x10 <sup>-2</sup> | up |
| PE(17:0/0:0)                          | 2.915  | 2.16x10 <sup>-4</sup> | 5.61x10 <sup>-3</sup> | up |
| C29 H49 O9                            | 2.929  | 5.30x10 <sup>-4</sup> | 7.35x10 <sup>-3</sup> | up |
| PE(19:0/0:0)                          | 3.141  | 1.15x10 <sup>-4</sup> | 3.08x10 <sup>-3</sup> | up |
| PE(21:0/0:0)                          | 3.475  | 7.88x10 <sup>-5</sup> | 2.16x10 <sup>-3</sup> | up |
| N-Carbamoyl-DL-aspartic acid          | 6.593  | 7.35x10 <sup>-6</sup> | 2.08x10 <sup>-4</sup> | up |
| 2-Hydroxy-C18-cerebroside             | 8.068  | 4.56x10 <sup>-5</sup> | 1.27x10 <sup>-3</sup> | up |
| C34 H27 N18                           | 9.794  | 4.03x10 <sup>-4</sup> | 5.65x10 <sup>-3</sup> | up |
| C49 H33 N2 O2                         | 10.285 | 4.71x10 <sup>-5</sup> | 8.00x10 <sup>-4</sup> | up |
| C27 H13 N10 O14                       | 10.464 | 4.09x10 <sup>-5</sup> | 7.03x10 <sup>-4</sup> | up |
| C41 H41 N10 O2                        | 10.584 | 3.94x10 <sup>-5</sup> | 6.85x10 <sup>-4</sup> | up |
| PI(22:4(7Z,10Z,13Z,16Z)/0:0)          | 10.603 | 3.92x10 <sup>-5</sup> | 6.85x10 <sup>-4</sup> | up |
| C51 H37 N2 O2                         | 10.637 | 3.82x10 <sup>-5</sup> | 6.80x10 <sup>-4</sup> | up |
| C18 H10 N12 O10                       | 10.669 | 3.80x10 <sup>-5</sup> | 6.80x10 <sup>-4</sup> | up |
| C22 H37 N12 O4                        | 10.796 | 3.44x10 <sup>-5</sup> | 6.26x10 <sup>-4</sup> | up |
| C34 H35 N15 O4                        | 10.871 | 3.33x10 <sup>-5</sup> | 6.15x10 <sup>-4</sup> | up |
| PS(22:2(13Z,16Z)/18:1(9Z))            | 11.203 | 1.10x10 <sup>-3</sup> | 2.71x10 <sup>-2</sup> | up |
| PS(18:0/20:0)                         | 11.367 | 1.12x10 <sup>-3</sup> | 2.73x10 <sup>-2</sup> | up |
| C30 H46 N8 O2                         | 11.489 | 1.66x10 <sup>-4</sup> | 2.50x10 <sup>-3</sup> | up |
| PI(20:4(5Z,8Z,11Z,14Z)/0:0)           | 11.528 | 1.26x10 <sup>-3</sup> | 3.03x10 <sup>-2</sup> | up |
| PE(18:0/0:0) Esi-5.9736667            | 11.564 | 1.83x10 <sup>-4</sup> | 2.71x10 <sup>-3</sup> | up |
| Gibberellin A15                       | 11.579 | 1.32x10 <sup>-3</sup> | 3.14x10 <sup>-2</sup> | up |
| C30 H29 N18 O3                        | 11.657 | 1.19x10 <sup>-4</sup> | 1.88x10 <sup>-3</sup> | up |
| C26 H20 N12 O12                       | 11.691 | 1.12x10 <sup>-4</sup> | 1.78x10 <sup>-3</sup> | up |
| C37 H35 N8 O3                         | 11.695 | 1.40x10 <sup>-4</sup> | 2.16x10 <sup>-3</sup> | up |
| PS(20:4(5Z,8Z,11Z,14Z)/19:0)          | 12.296 | 1.13x10 <sup>-4</sup> | 3.03x10 <sup>-3</sup> | up |
| C19 H36 N15 O8                        | 12.386 | 1.52x10 <sup>-4</sup> | 4.02x10 <sup>-3</sup> | up |
| C26 H35 N19 O4                        | 12.454 | 8.58x10 <sup>-5</sup> | 1.41x10 <sup>-3</sup> | up |
| C29 H35 N14 O2                        | 12.461 | 1.23x10 <sup>-4</sup> | 1.92x10 <sup>-3</sup> | up |
| C21 H18 N8                            | 12.585 | 2.64x10 <sup>-4</sup> | 3.81x10 <sup>-3</sup> | up |
| C24 H4 N4 O8                          | 12.604 | 1.01x10 <sup>-4</sup> | 1.63x10 <sup>-3</sup> | up |
| PS(21:0/20:5(5Z,8Z,11Z,14Z,17Z))      | 12.680 | 1.45x10 <sup>-4</sup> | 2.22x10 <sup>-3</sup> | up |
| Khayasin                              | 12.861 | 5.33x10 <sup>-5</sup> | 1.47x10 <sup>-3</sup> | up |
| Tamarixetin 5-glucoside-7-glucuronide | 13.061 | 2.54x10 <sup>-4</sup> | 3.69x10 <sup>-3</sup> | up |
| 2-oxo-nonadecanoic acid               | 13.276 | 5.42x10 <sup>-6</sup> | 1.58x10 <sup>-4</sup> | up |
| Erythrodiol                           | 13.286 | 4.55x10 <sup>-6</sup> | 1.38x10 <sup>-4</sup> | up |
| LysoPE(20:1(11Z)/0:0)                 | 13.301 | 4.60x10 <sup>-6</sup> | 1.38x10 <sup>-4</sup> | up |
| C25 H19 N17 O3                        | 13.312 | 7.22x10 <sup>-6</sup> | 2.06x10 <sup>-4</sup> | up |
| Erythrodiol Esi+8.927667              | 13.331 | 4.59x10 <sup>-6</sup> | 1.38x10 <sup>-4</sup> | up |
| PI(20:3(8Z,11Z,14Z)/0:0)              | 13.441 | 1.26x10 <sup>-5</sup> | 2.40x10 <sup>-4</sup> | up |
| LysoPE(0:0/22:0) Esi+6.8786664        | 13.479 | 4.39x10 <sup>-6</sup> | 1.36x10 <sup>-4</sup> | up |

|                                                       |        |                       |                       |    |
|-------------------------------------------------------|--------|-----------------------|-----------------------|----|
| C32 H53 N O2                                          | 13.542 | 5.66x10 <sup>-6</sup> | 1.64x10 <sup>-4</sup> | up |
| C17 H29 N17 O5                                        | 13.553 | 4.12x10 <sup>-6</sup> | 1.32x10 <sup>-4</sup> | up |
| C39 H35 N5 O2                                         | 13.556 | 4.64x10 <sup>-6</sup> | 1.38x10 <sup>-4</sup> | up |
| C28 H51 N7 O2                                         | 13.591 | 4.23x10 <sup>-6</sup> | 1.33x10 <sup>-4</sup> | up |
| C46 H76 N4 O3                                         | 13.591 | 3.97x10 <sup>-6</sup> | 1.30x10 <sup>-4</sup> | up |
| C19 H14 N8 O15                                        | 13.636 | 1.17x10 <sup>-5</sup> | 2.30x10 <sup>-4</sup> | up |
| C31 H21 N14 O2                                        | 13.647 | 4.32x10 <sup>-6</sup> | 1.34x10 <sup>-4</sup> | up |
| C37 H31 N11 O                                         | 13.672 | 4.18x10 <sup>-6</sup> | 1.32x10 <sup>-4</sup> | up |
| C18 H4 N O21 S2                                       | 13.683 | 4.67x10 <sup>-6</sup> | 1.39x10 <sup>-4</sup> | up |
| C20 H20 N3 O23                                        | 13.692 | 1.17x10 <sup>-5</sup> | 2.30x10 <sup>-4</sup> | up |
| C11 H14 O17                                           | 13.699 | 1.20x10 <sup>-5</sup> | 2.32x10 <sup>-4</sup> | up |
| C26 H40 N11 O                                         | 13.708 | 1.14x10 <sup>-5</sup> | 2.30x10 <sup>-4</sup> | up |
| C23 H21 N                                             | 13.744 | 3.70x10 <sup>-6</sup> | 1.28x10 <sup>-4</sup> | up |
| C40 H48 O3                                            | 13.818 | 3.85x10 <sup>-6</sup> | 1.30x10 <sup>-4</sup> | up |
| C34 H33 N12 O                                         | 13.819 | 3.90x10 <sup>-6</sup> | 1.30x10 <sup>-4</sup> | up |
| Lys Phe Lys                                           | 13.845 | 3.57x10 <sup>-6</sup> | 1.26x10 <sup>-4</sup> | up |
| C38 H21 N8 O2                                         | 13.854 | 3.80x10 <sup>-6</sup> | 1.30x10 <sup>-4</sup> | up |
| 24-isopropenyl-22E-dehydrocholesterol<br>Esi+8.146999 | 13.855 | 3.70x10 <sup>-6</sup> | 1.28x10 <sup>-4</sup> | up |
| Glycerophospho-N-Oleoyl Ethanolamine<br>Esi-5.9839997 | 13.902 | 1.09x10 <sup>-5</sup> | 2.26x10 <sup>-4</sup> | up |
| C25 H21 N20 O8                                        | 13.914 | 3.91x10 <sup>-6</sup> | 1.30x10 <sup>-4</sup> | up |
| C29 H41 N13 O4                                        | 13.915 | 1.09x10 <sup>-5</sup> | 2.26x10 <sup>-4</sup> | up |
| p-HydroxyPiroxicam glucuronide                        | 13.915 | 1.08x10 <sup>-5</sup> | 2.26x10 <sup>-4</sup> | up |
| C27 H42 N8 O5                                         | 13.918 | 1.06x10 <sup>-5</sup> | 2.26x10 <sup>-4</sup> | up |
| C13 H18 N6 O7                                         | 13.926 | 3.72x10 <sup>-6</sup> | 1.28x10 <sup>-4</sup> | up |
| PE(O-18:0/0:0)                                        | 13.942 | 3.55x10 <sup>-6</sup> | 1.26x10 <sup>-4</sup> | up |
| C18 H26 N6 O18                                        | 13.973 | 1.04x10 <sup>-5</sup> | 2.26x10 <sup>-4</sup> | up |
| C35 H37 N4 O8                                         | 13.992 | 1.06x10 <sup>-5</sup> | 2.26x10 <sup>-4</sup> | up |
| C8 H11 N6 O6                                          | 13.997 | 1.06x10 <sup>-5</sup> | 2.26x10 <sup>-4</sup> | up |
| C28 H35 N3 O3                                         | 14.044 | 3.48x10 <sup>-6</sup> | 1.26x10 <sup>-4</sup> | up |
| C31 H43 N4 O3                                         | 14.081 | 3.36x10 <sup>-6</sup> | 1.25x10 <sup>-4</sup> | up |
| C30 H33 N10                                           | 14.082 | 3.40x10 <sup>-6</sup> | 1.25x10 <sup>-4</sup> | up |
| C20 H27 N20 O3                                        | 14.084 | 3.59x10 <sup>-6</sup> | 1.26x10 <sup>-4</sup> | up |
| C36 H35 N11 O3                                        | 14.084 | 1.01x10 <sup>-5</sup> | 2.26x10 <sup>-4</sup> | up |
| C38 H34 N6 O                                          | 14.152 | 3.52x10 <sup>-6</sup> | 1.26x10 <sup>-4</sup> | up |
| 2-Hydroxyfelbamate                                    | 14.181 | 3.19x10 <sup>-6</sup> | 1.25x10 <sup>-4</sup> | up |
| PG(16:0/0:0)[U] Esi-7.0033336                         | 14.194 | 9.64x10 <sup>-6</sup> | 2.26x10 <sup>-4</sup> | up |
| C33 H9 N10 O11                                        | 14.211 | 9.63x10 <sup>-6</sup> | 2.26x10 <sup>-4</sup> | up |
| PE(18:0/0:0) Esi+5.653667                             | 14.215 | 3.40x10 <sup>-6</sup> | 1.25x10 <sup>-4</sup> | up |
| C4 H Cl2 O2 S2                                        | 14.230 | 9.70x10 <sup>-6</sup> | 2.26x10 <sup>-4</sup> | up |
| C25 H45 N11 O3                                        | 14.232 | 3.29x10 <sup>-6</sup> | 1.25x10 <sup>-4</sup> | up |
| C15 H10 N5 O14 S                                      | 14.236 | 9.84x10 <sup>-6</sup> | 2.26x10 <sup>-4</sup> | up |
| C23 H9 N6 O13                                         | 14.236 | 9.69x10 <sup>-6</sup> | 2.26x10 <sup>-4</sup> | up |
| C15 H12 N5 O4 S2                                      | 14.241 | 9.63x10 <sup>-6</sup> | 2.26x10 <sup>-4</sup> | up |
| 24-isopropenyl-22E-dehydrocholesterol                 | 14.244 | 3.58x10 <sup>-6</sup> | 1.26x10 <sup>-4</sup> | up |

|                                             |        |                       |                       |    |
|---------------------------------------------|--------|-----------------------|-----------------------|----|
| C21 H10 O22                                 | 14.262 | 9.57x10 <sup>-6</sup> | 2.26x10 <sup>-4</sup> | up |
| LysoPE(0:0/20:0) Esi+6.183                  | 14.268 | 3.27x10 <sup>-6</sup> | 1.25x10 <sup>-4</sup> | up |
| C18 H35 N22                                 | 14.276 | 9.41x10 <sup>-6</sup> | 2.26x10 <sup>-4</sup> | up |
| C13 H13 N O9                                | 14.291 | 3.33x10 <sup>-6</sup> | 1.25x10 <sup>-4</sup> | up |
| Riboflavin cyclic-4',5'-phosphate           | 14.299 | 3.25x10 <sup>-6</sup> | 1.25x10 <sup>-4</sup> | up |
| C26 H21 N17 O3                              | 14.317 | 3.22x10 <sup>-6</sup> | 1.25x10 <sup>-4</sup> | up |
| LysoPE(0:0/22:1(13Z))                       | 14.327 | 3.16x10 <sup>-6</sup> | 1.25x10 <sup>-4</sup> | up |
| C32 H25 N14 O4                              | 14.378 | 3.09x10 <sup>-6</sup> | 1.25x10 <sup>-4</sup> | up |
| Anandamide (20:2, n-6)                      | 14.401 | 6.43x10 <sup>-6</sup> | 1.84x10 <sup>-4</sup> | up |
| C24 H16 N6 O17 S                            | 14.405 | 9.46x10 <sup>-6</sup> | 2.26x10 <sup>-4</sup> | up |
| C16 H45 N15 O2 S2                           | 14.422 | 3.02x10 <sup>-6</sup> | 1.25x10 <sup>-4</sup> | up |
| (4E,8E,10E-d18:3)sphingosine                | 14.428 | 3.00x10 <sup>-6</sup> | 1.25x10 <sup>-4</sup> | up |
| Procaterol                                  | 14.428 | 4.08x10 <sup>-6</sup> | 1.32x10 <sup>-4</sup> | up |
| PG(16:0/0:0)[U]                             | 14.444 | 9.97x10 <sup>-6</sup> | 2.26x10 <sup>-4</sup> | up |
| C16 H22 N2 O4                               | 14.449 | 3.15x10 <sup>-6</sup> | 1.25x10 <sup>-4</sup> | up |
| C8 H17 N4 O7                                | 14.467 | 1.49x10 <sup>-5</sup> | 4.19x10 <sup>-4</sup> | up |
| C20 H5 N3 O                                 | 14.497 | 2.96x10 <sup>-6</sup> | 1.25x10 <sup>-4</sup> | up |
| Inosine Esi-0.7266667                       | 14.513 | 9.94x10 <sup>-6</sup> | 2.26x10 <sup>-4</sup> | up |
| C15 H16 N9 Esi+2.8553333                    | 14.538 | 3.23x10 <sup>-6</sup> | 1.25x10 <sup>-4</sup> | up |
| PG(18:1(9E)/0:0)[U]                         | 14.548 | 8.91x10 <sup>-6</sup> | 2.26x10 <sup>-4</sup> | up |
| C23 H35 O8                                  | 14.599 | 2.88x10 <sup>-6</sup> | 1.24x10 <sup>-4</sup> | up |
| C10 N O6                                    | 14.602 | 2.86x10 <sup>-6</sup> | 1.24x10 <sup>-4</sup> | up |
| C13 H17 N O4 S                              | 14.623 | 2.81x10 <sup>-6</sup> | 1.24x10 <sup>-4</sup> | up |
| C16 H16 N9 O8 Esi+3.78                      | 14.628 | 2.88x10 <sup>-6</sup> | 1.24x10 <sup>-4</sup> | up |
| LysoPE(0:0/22:0)                            | 14.651 | 2.85x10 <sup>-6</sup> | 1.24x10 <sup>-4</sup> | up |
| C22 H23 N2 O24                              | 14.658 | 8.42x10 <sup>-6</sup> | 2.26x10 <sup>-4</sup> | up |
| PI(20:4(5Z,8Z,11Z,14Z)/0:0) Esi-6.0156665   | 14.669 | 8.45x10 <sup>-6</sup> | 2.26x10 <sup>-4</sup> | up |
| Inosine                                     | 14.710 | 8.60x10 <sup>-6</sup> | 2.26x10 <sup>-4</sup> | up |
| PE(19:1(9Z)/0:0) Esi+5.4406667              | 14.741 | 2.80x10 <sup>-6</sup> | 1.24x10 <sup>-4</sup> | up |
| C16 H41 N11 O9                              | 14.741 | 8.11x10 <sup>-6</sup> | 2.26x10 <sup>-4</sup> | up |
| 1H-Indole-4-acetic acid, 2,3-dihydro-2-oxo- | 14.811 | 2.72x10 <sup>-6</sup> | 1.24x10 <sup>-4</sup> | up |
| C33 H19 N18 O Esi+5.120333                  | 14.811 | 2.68x10 <sup>-6</sup> | 1.24x10 <sup>-4</sup> | up |
| C35 H52 N4 O3                               | 14.821 | 3.18x10 <sup>-6</sup> | 1.25x10 <sup>-4</sup> | up |
| C15 H16 N9                                  | 14.822 | 2.74x10 <sup>-6</sup> | 1.24x10 <sup>-4</sup> | up |
| L-Formylkynurenine                          | 14.844 | 2.61x10 <sup>-6</sup> | 1.24x10 <sup>-4</sup> | up |
| 3'-Methoxy-E,E-dienoestrol                  | 14.846 | 2.58x10 <sup>-6</sup> | 1.24x10 <sup>-4</sup> | up |
| C31 H49 N7 O2                               | 14.875 | 2.77x10 <sup>-6</sup> | 1.24x10 <sup>-4</sup> | up |
| C26 H14 N2 O8                               | 14.933 | 2.63x10 <sup>-6</sup> | 1.24x10 <sup>-4</sup> | up |
| C19 H12 N8 O8                               | 14.939 | 2.59x10 <sup>-6</sup> | 1.24x10 <sup>-4</sup> | up |
| 4-Methylumbelliferyl sulfate                | 14.963 | 7.72x10 <sup>-6</sup> | 2.26x10 <sup>-4</sup> | up |
| Amaranol B                                  | 15.009 | 8.73x10 <sup>-6</sup> | 2.26x10 <sup>-4</sup> | up |
| C43 H51 N8 O                                | 15.011 | 2.83x10 <sup>-6</sup> | 1.24x10 <sup>-4</sup> | up |
| C29 H45 N7 O4                               | 15.024 | 7.44x10 <sup>-6</sup> | 2.26x10 <sup>-4</sup> | up |
| C5 H8 N O9                                  | 15.036 | 7.55x10 <sup>-6</sup> | 2.26x10 <sup>-4</sup> | up |
| C30 H12 N4 O2                               | 15.045 | 2.63x10 <sup>-6</sup> | 1.24x10 <sup>-4</sup> | up |

|                                                  |        |                       |                       |    |
|--------------------------------------------------|--------|-----------------------|-----------------------|----|
| C24 H14 N7 O6                                    | 15.078 | 2.48x10 <sup>-6</sup> | 1.24x10 <sup>-4</sup> | up |
| 2-Amino-3,7-dideoxy-D-threo-hept-6-ulosonic acid | 15.083 | 7.36x10 <sup>-6</sup> | 2.26x10 <sup>-4</sup> | up |
| C30 H53 N O2                                     | 15.117 | 2.53x10 <sup>-6</sup> | 1.24x10 <sup>-4</sup> | up |
| C14 H14 N9 O8                                    | 15.167 | 2.40x10 <sup>-6</sup> | 1.24x10 <sup>-4</sup> | up |
| Dihydrocordoin                                   | 15.170 | 2.45x10 <sup>-6</sup> | 1.24x10 <sup>-4</sup> | up |
| 7-Hydroxypipotiazine glucuronide                 | 15.238 | 2.32x10 <sup>-6</sup> | 1.24x10 <sup>-4</sup> | up |
| 4-Heptyloxyphenol                                | 15.265 | 2.32x10 <sup>-6</sup> | 1.24x10 <sup>-4</sup> | up |
| PE(O-16:0/0:0)                                   | 15.266 | 6.89x10 <sup>-6</sup> | 2.26x10 <sup>-4</sup> | up |
| PI(20:4(5Z,8Z,11Z,14Z)/0:0)                      | 15.281 | 6.86x10 <sup>-6</sup> | 2.26x10 <sup>-4</sup> | up |
| Captopril disulfide                              | 15.311 | 2.29x10 <sup>-6</sup> | 1.24x10 <sup>-4</sup> | up |
| C27 H23 N17 O6 Esi+5.120333                      | 15.347 | 2.27x10 <sup>-6</sup> | 1.24x10 <sup>-4</sup> | up |
| C21 H23 N20 O6                                   | 15.372 | 2.22x10 <sup>-6</sup> | 1.24x10 <sup>-4</sup> | up |
| Immepip                                          | 15.398 | 5.81x10 <sup>-6</sup> | 1.67x10 <sup>-4</sup> | up |
| C21 H12 N9 O5                                    | 15.403 | 2.27x10 <sup>-6</sup> | 1.24x10 <sup>-4</sup> | up |
| n-Pentadecylamine                                | 15.430 | 2.29x10 <sup>-6</sup> | 1.24x10 <sup>-4</sup> | up |
| C5 H5 N O5                                       | 15.445 | 7.84x10 <sup>-6</sup> | 2.26x10 <sup>-4</sup> | up |
| C32 H57 N O3                                     | 15.445 | 2.28x10 <sup>-6</sup> | 1.24x10 <sup>-4</sup> | up |
| C14 H14 N2 O11 S                                 | 15.451 | 2.25x10 <sup>-6</sup> | 1.24x10 <sup>-4</sup> | up |
| C33 H21 N18 O2                                   | 15.466 | 2.15x10 <sup>-6</sup> | 1.24x10 <sup>-4</sup> | up |
| C13 H4 O16                                       | 15.523 | 6.45x10 <sup>-6</sup> | 2.26x10 <sup>-4</sup> | up |
| 9-bromo-decanoic acid                            | 15.556 | 2.29x10 <sup>-6</sup> | 1.24x10 <sup>-4</sup> | up |
| C12 H2 N2 O9                                     | 15.565 | 6.35x10 <sup>-6</sup> | 2.26x10 <sup>-4</sup> | up |
| C8 H4 N3 O11                                     | 15.592 | 2.30x10 <sup>-6</sup> | 1.24x10 <sup>-4</sup> | up |
| C14 H16 O18                                      | 15.593 | 6.25x10 <sup>-6</sup> | 2.26x10 <sup>-4</sup> | up |
| C30 H14 N4 O4                                    | 15.676 | 2.05x10 <sup>-6</sup> | 1.24x10 <sup>-4</sup> | up |
| C29 H19 N19 O2                                   | 15.710 | 2.05x10 <sup>-6</sup> | 1.24x10 <sup>-4</sup> | up |
| C4 H8 N3 O5                                      | 15.727 | 5.98x10 <sup>-6</sup> | 2.26x10 <sup>-4</sup> | up |
| C21 H20 N2 O17                                   | 15.727 | 6.04x10 <sup>-6</sup> | 2.26x10 <sup>-4</sup> | up |
| C23 H14 N8 O5                                    | 15.785 | 2.00x10 <sup>-6</sup> | 1.24x10 <sup>-4</sup> | up |
| cis-12a-Hydroxyrot-2'-enonic acid                | 15.820 | 2.02x10 <sup>-6</sup> | 1.24x10 <sup>-4</sup> | up |
| C27 H19 N21                                      | 15.900 | 1.93x10 <sup>-6</sup> | 1.24x10 <sup>-4</sup> | up |
| Met-Tyr-OH                                       | 15.905 | 1.93x10 <sup>-6</sup> | 1.24x10 <sup>-4</sup> | up |
| 4,4'-Biphenyldithiol                             | 15.919 | 1.98x10 <sup>-5</sup> | 5.51x10 <sup>-4</sup> | up |
| C27 H23 N17 O4                                   | 15.940 | 1.90x10 <sup>-6</sup> | 1.24x10 <sup>-4</sup> | up |
| C29 H14 N3 O4                                    | 15.963 | 1.93x10 <sup>-6</sup> | 1.24x10 <sup>-4</sup> | up |
| C12 H14 N O14                                    | 15.965 | 5.64x10 <sup>-6</sup> | 2.26x10 <sup>-4</sup> | up |
| Maleamic acid                                    | 15.974 | 4.11x10 <sup>-6</sup> | 1.32x10 <sup>-4</sup> | up |
| C42 H25 N5 O4                                    | 16.016 | 1.87x10 <sup>-6</sup> | 1.24x10 <sup>-4</sup> | up |
| LysoPE(0:0/20:0)                                 | 16.017 | 1.88x10 <sup>-6</sup> | 1.24x10 <sup>-4</sup> | up |
| Melphalan                                        | 16.038 | 1.85x10 <sup>-6</sup> | 1.24x10 <sup>-4</sup> | up |
| CDP-DG(16:0/16:0)                                | 16.057 | 5.85x10 <sup>-6</sup> | 2.26x10 <sup>-4</sup> | up |
| C33 H19 N18 O                                    | 16.069 | 1.80x10 <sup>-6</sup> | 1.24x10 <sup>-4</sup> | up |
| C25 H23 N20 O6                                   | 16.079 | 1.80x10 <sup>-6</sup> | 1.24x10 <sup>-4</sup> | up |
| C10 H10 O7 S                                     | 16.100 | 5.35x10 <sup>-6</sup> | 2.26x10 <sup>-4</sup> | up |
| PE(O-16:0/0:0)                                   | 16.157 | 1.74x10 <sup>-6</sup> | 1.24x10 <sup>-4</sup> | up |

|                                      |        |                       |                       |    |
|--------------------------------------|--------|-----------------------|-----------------------|----|
| C14 H4 N O13                         | 16.196 | 5.20x10 <sup>-6</sup> | 2.26x10 <sup>-4</sup> | up |
| Thr Ser Ser                          | 16.240 | 1.70x10 <sup>-6</sup> | 1.24x10 <sup>-4</sup> | up |
| C32 H57 N O2                         | 16.262 | 1.71x10 <sup>-6</sup> | 1.24x10 <sup>-4</sup> | up |
| C10 H4 O7                            | 16.328 | 5.02x10 <sup>-6</sup> | 2.26x10 <sup>-4</sup> | up |
| Gly Asp Asp                          | 16.352 | 5.01x10 <sup>-6</sup> | 2.26x10 <sup>-4</sup> | up |
| C26 H20 N O4                         | 16.402 | 1.65x10 <sup>-6</sup> | 1.24x10 <sup>-4</sup> | up |
| C16 H10 N6 O11 S                     | 16.566 | 4.72x10 <sup>-6</sup> | 2.26x10 <sup>-4</sup> | up |
| C27 H23 N17 O6                       | 16.627 | 1.52x10 <sup>-6</sup> | 1.24x10 <sup>-4</sup> | up |
| C27 H23 N11 O4                       | 16.629 | 1.55x10 <sup>-6</sup> | 1.24x10 <sup>-4</sup> | up |
| 4-Methylumbelliferyl β-D-glucuronide | 16.721 | 4.51x10 <sup>-6</sup> | 2.26x10 <sup>-4</sup> | up |
| C22 H12 N10 O3                       | 16.750 | 1.48x10 <sup>-6</sup> | 1.24x10 <sup>-4</sup> | up |
| C26 H22 N O5                         | 16.934 | 1.42x10 <sup>-6</sup> | 1.24x10 <sup>-4</sup> | up |
| C7 H9 Cl N2 O2 S                     | 17.099 | 1.40x10 <sup>-6</sup> | 1.24x10 <sup>-4</sup> | up |
| PE(14:0/18:0)                        | 17.187 | 1.30x10 <sup>-6</sup> | 1.20x10 <sup>-4</sup> | up |
| C16 H14 N9 O7                        | 17.296 | 1.28x10 <sup>-6</sup> | 1.20x10 <sup>-4</sup> | up |
| C20 H21 N17 O4                       | 17.309 | 1.27x10 <sup>-6</sup> | 1.20x10 <sup>-4</sup> | up |
| PE(18:0/16:1(9Z))                    | 17.368 | 1.56x10 <sup>-6</sup> | 1.24x10 <sup>-4</sup> | up |
| C16 H16 N9 O8                        | 17.408 | 1.24x10 <sup>-6</sup> | 1.20x10 <sup>-4</sup> | up |
| C5 H4 N3 O8                          | 17.799 | 3.42x10 <sup>-6</sup> | 1.92x10 <sup>-4</sup> | up |
| Chlorophacinone                      | 17.930 | 1.07x10 <sup>-6</sup> | 1.10x10 <sup>-4</sup> | up |
| C8 H4 N6 O5 S                        | 18.047 | 3.18x10 <sup>-6</sup> | 1.88x10 <sup>-4</sup> | up |
| C3 H4 N5 O3                          | 18.154 | 3.24x10 <sup>-6</sup> | 1.88x10 <sup>-4</sup> | up |
| C34 H25 N11 O3                       | 18.352 | 9.60x10 <sup>-7</sup> | 1.03x10 <sup>-4</sup> | up |
| C13 H14 N2 O11                       | 18.901 | 2.66x10 <sup>-6</sup> | 1.68x10 <sup>-4</sup> | up |
| C27 H23 N17 O3                       | 18.908 | 8.37x10 <sup>-7</sup> | 9.60x10 <sup>-5</sup> | up |
| C16 H16 N9 O9                        | 18.958 | 8.23x10 <sup>-7</sup> | 9.60x10 <sup>-5</sup> | up |
| 5-Aminopentanoic acid                | 19.028 | 4.42x10 <sup>-6</sup> | 1.36x10 <sup>-4</sup> | up |
| C5 H4 N5 O4                          | 20.413 | 5.96x10 <sup>-7</sup> | 9.04x10 <sup>-5</sup> | up |
| L-Aspartic Acid                      | 21.042 | 1.63x10 <sup>-6</sup> | 1.07x10 <sup>-4</sup> | up |

---
