# Supplementary material for: Metabolomic Approach to Identify Potential Biomarkers in KRAS-Mutant Pancreatic Cancer Cells
Source: MDPI journal article supplement (doi:10.3390/biomedicines12040865), 2024-04-15
Supplement: s1 [file s1]

**Table S1.** Metabolites differentially identified in KRAS-WT and KRAS-mutant pancreatic cancer cells (BxPC3 vs. PANC1).

| Compound                               | Log FC  | p                     | p (Corr)              | Regulation |
|----------------------------------------|---------|-----------------------|-----------------------|------------|
| Erythrose                              | -19.753 | 1.86x10 <sup>-5</sup> | 6.90x10 <sup>-4</sup> | down       |
| C7 H15 N5 O3                           | -19.377 | 9.02x10 <sup>-7</sup> | 1.38x10 <sup>-4</sup> | down       |
| PE(O-16:0/17:0)                        | -18.449 | 3.99x10 <sup>-6</sup> | 1.71x10 <sup>-4</sup> | down       |
| C5 H7 N6 O2                            | -17.843 | 9.58x10 <sup>-7</sup> | 1.38x10 <sup>-4</sup> | down       |
| PE(9:0/9:0)[U]                         | -17.536 | 1.51x10 <sup>-6</sup> | 1.38x10 <sup>-4</sup> | down       |
| 4,4'-Biphenyldithiol                   | -17.092 | 3.95x10 <sup>-6</sup> | 1.71x10 <sup>-4</sup> | down       |
| Kynurenine                             | -17.077 | 1.16x10 <sup>-6</sup> | 1.38x10 <sup>-4</sup> | down       |
| Bufexamac                              | -16.812 | 1.44x10 <sup>-6</sup> | 1.38x10 <sup>-4</sup> | down       |
| Pinacidil                              | -16.675 | 1.96x10 <sup>-5</sup> | 7.21x10 <sup>-4</sup> | down       |
| C3 H5 N4 O2                            | -16.639 | 2.10x10 <sup>-6</sup> | 1.38x10 <sup>-4</sup> | down       |
| C8 H8 N3 O9                            | -16.516 | 4.99x10 <sup>-6</sup> | 3.48x10 <sup>-4</sup> | down       |
| Levuglandin E2                         | -16.377 | 5.49x10 <sup>-6</sup> | 3.49x10 <sup>-4</sup> | down       |
| C11 H26 N O2 S                         | -16.356 | 2.11x10 <sup>-6</sup> | 1.38x10 <sup>-4</sup> | down       |
| C13 H18 N13 O6                         | -16.313 | 1.43x10 <sup>-6</sup> | 1.38x10 <sup>-4</sup> | down       |
| PE(9:0/9:0)[U] Esi+10.643333           | -16.228 | 1.86x10 <sup>-6</sup> | 1.38x10 <sup>-4</sup> | down       |
| C37 H39 N8                             | -16.167 | 1.69x10 <sup>-6</sup> | 1.38x10 <sup>-4</sup> | down       |
| Sphinganine                            | -16.125 | 1.72x10 <sup>-6</sup> | 1.38x10 <sup>-4</sup> | down       |
| C11 H17 N7 O9 S                        | -16.015 | 1.60x10 <sup>-6</sup> | 1.38x10 <sup>-4</sup> | down       |
| Stearamide                             | -15.945 | 1.59x10 <sup>-6</sup> | 1.38x10 <sup>-4</sup> | down       |
| C19 H41 N O2                           | -15.831 | 1.72x10 <sup>-6</sup> | 1.38x10 <sup>-4</sup> | down       |
| C12 H23 N O5                           | -15.826 | 3.26x10 <sup>-6</sup> | 1.59x10 <sup>-4</sup> | down       |
| N-(2,3-Dihydroxybenzoyl)-L-serine      | -15.784 | 6.17x10 <sup>-6</sup> | 3.64x10 <sup>-4</sup> | down       |
| N-Oleoyl-L-Serine                      | -15.680 | 1.74x10 <sup>-6</sup> | 1.38x10 <sup>-4</sup> | down       |
| C27 H49 O18 S                          | -15.599 | 2.18x10 <sup>-6</sup> | 1.38x10 <sup>-4</sup> | down       |
| C46 H51 N O                            | -15.507 | 9.02x10 <sup>-6</sup> | 3.64x10 <sup>-4</sup> | down       |
| C17 H23 N6 O                           | -15.477 | 9.57x10 <sup>-6</sup> | 3.64x10 <sup>-4</sup> | down       |
| Spisulosine                            | -15.435 | 2.08x10 <sup>-6</sup> | 1.38x10 <sup>-4</sup> | down       |
| C23 H19 O6 S                           | -15.406 | 1.90x10 <sup>-6</sup> | 1.38x10 <sup>-4</sup> | down       |
| Levuglandin E2 Esi-4.733333            | -15.352 | 7.42x10 <sup>-6</sup> | 3.64x10 <sup>-4</sup> | down       |
| Hectochlorin                           | -15.306 | 2.00x10 <sup>-6</sup> | 1.38x10 <sup>-4</sup> | down       |
| C22 H24 N3                             | -15.252 | 3.99x10 <sup>-6</sup> | 1.71x10 <sup>-4</sup> | down       |
| Spisulosine Esi+5.2253337              | -15.187 | 2.30x10 <sup>-6</sup> | 1.41x10 <sup>-4</sup> | down       |
| C12 H21 N O4                           | -15.177 | 2.16x10 <sup>-6</sup> | 1.38x10 <sup>-4</sup> | down       |
| C14 N O S                              | -15.092 | 2.08x10 <sup>-6</sup> | 1.38x10 <sup>-4</sup> | down       |
| PS(18:0/20:3(8Z,11Z,14Z))              | -15.075 | 5.36x10 <sup>-6</sup> | 2.15x10 <sup>-4</sup> | down       |
| PS(12:0/12:0)[U]                       | -15.021 | 2.38x10 <sup>-6</sup> | 1.43x10 <sup>-4</sup> | down       |
| PE(P-18:0/17:1(9Z))                    | -15.021 | 2.10x10 <sup>-6</sup> | 1.38x10 <sup>-4</sup> | down       |
| S-(1,2-Dicarboxyethyl)Glutathione      | -15.017 | 8.54x10 <sup>-6</sup> | 3.64x10 <sup>-4</sup> | down       |
| 13,14-dihydro-15-keto Prostaglandin J2 | -15.015 | 2.17x10 <sup>-6</sup> | 1.38x10 <sup>-4</sup> | down       |
| PE(13:0/10:0)[U]                       | -14.998 | 2.50x10 <sup>-6</sup> | 1.43x10 <sup>-4</sup> | down       |
| C8 H17 N5 O4                           | -14.930 | 2.50x10 <sup>-6</sup> | 1.43x10 <sup>-4</sup> | down       |
| C27 H43 N8 O10 S                       | -14.916 | 8.18x10 <sup>-6</sup> | 3.64x10 <sup>-4</sup> | down       |
| C7 H13 N O2 S                          | -14.901 | 2.56x10 <sup>-6</sup> | 1.44x10 <sup>-4</sup> | down       |
| C17 H26 N3 O19                         | -14.897 | 8.16x10 <sup>-6</sup> | 3.64x10 <sup>-4</sup> | down       |

|                                                                                   |         |                       |                       |      |
|-----------------------------------------------------------------------------------|---------|-----------------------|-----------------------|------|
| PE(19:1(9Z)/0:0)                                                                  | -14.896 | 2.77x10 <sup>-6</sup> | 1.46x10 <sup>-4</sup> | down |
| C10 H15 O10 S2                                                                    | -14.864 | 2.22x10 <sup>-6</sup> | 1.39x10 <sup>-4</sup> | down |
| 13,14-dihydro-15-keto Prostaglandin J2<br>Esi+4.403333                            | -14.807 | 2.89x10 <sup>-6</sup> | 1.49x10 <sup>-4</sup> | down |
| Glycerophospho-N-Oleoyl Ethanolamine Esi-<br>5.9833336                            | -14.763 | 9.14x10 <sup>-6</sup> | 3.64x10 <sup>-4</sup> | down |
| L 735821                                                                          | -14.743 | 8.63x10 <sup>-6</sup> | 3.64x10 <sup>-4</sup> | down |
| PI(18:1(9Z)/0:0)                                                                  | -14.743 | 3.32x10 <sup>-6</sup> | 1.59x10 <sup>-4</sup> | down |
| C38 H67 N9 O4                                                                     | -14.742 | 4.94x10 <sup>-6</sup> | 1.99x10 <sup>-4</sup> | down |
| C31 H43 N17                                                                       | -14.738 | 8.68x10 <sup>-6</sup> | 3.64x10 <sup>-4</sup> | down |
| C12 H15 N O2 S                                                                    | -14.638 | 2.51x10 <sup>-6</sup> | 1.43x10 <sup>-4</sup> | down |
| PI(20:4(5Z,8Z,11Z,14Z)/0:0)                                                       | -14.625 | 8.94x10 <sup>-6</sup> | 3.64x10 <sup>-4</sup> | down |
| C17 H38 N15 O8                                                                    | -14.605 | 2.46x10 <sup>-6</sup> | 1.43x10 <sup>-4</sup> | down |
| ADP-Mannose                                                                       | -14.596 | 1.12x10 <sup>-5</sup> | 3.97x10 <sup>-4</sup> | down |
| N-palmitoyl serine                                                                | -14.581 | 2.64x10 <sup>-6</sup> | 1.44x10 <sup>-4</sup> | down |
| (4E,8E,10E-d18:3) sphingosine                                                     | -14.531 | 2.68x10 <sup>-6</sup> | 1.44x10 <sup>-4</sup> | down |
| PI(16:1(9Z)/0:0)                                                                  | -14.502 | 9.29x10 <sup>-6</sup> | 3.64x10 <sup>-4</sup> | down |
| 1S,9R-Hydrastine                                                                  | -14.439 | 2.97x10 <sup>-6</sup> | 1.52x10 <sup>-4</sup> | down |
| Lauryl hydrogen sulfate                                                           | -14.375 | 1.04x10 <sup>-5</sup> | 3.82x10 <sup>-4</sup> | down |
| LysoPE(0:0/22:4(7Z,10Z,13Z,16Z))                                                  | -14.361 | 2.66x10 <sup>-6</sup> | 1.44x10 <sup>-4</sup> | down |
| PS(21:0/20:5(5Z,8Z,11Z,14Z,17Z))                                                  | -14.342 | 9.70x10 <sup>-6</sup> | 3.64x10 <sup>-4</sup> | down |
| C15 H33 N O                                                                       | -14.329 | 2.76x10 <sup>-6</sup> | 1.46x10 <sup>-4</sup> | down |
| ?-Tocotrienol                                                                     | -14.322 | 9.71x10 <sup>-6</sup> | 3.64x10 <sup>-4</sup> | down |
| C24 H41 N8                                                                        | -14.314 | 3.57x10 <sup>-6</sup> | 1.62x10 <sup>-4</sup> | down |
| 5-Oxoavermectin "2a" aglycone                                                     | -14.196 | 2.84x10 <sup>-6</sup> | 1.48x10 <sup>-4</sup> | down |
| C23 H47 N11                                                                       | -14.080 | 9.45x10 <sup>-6</sup> | 3.61x10 <sup>-4</sup> | down |
| C26 H20 N12 O12                                                                   | -13.910 | 1.14x10 <sup>-5</sup> | 3.97x10 <sup>-4</sup> | down |
| N-stearoyl glutamic acid                                                          | -13.870 | 4.22x10 <sup>-6</sup> | 1.79x10 <sup>-4</sup> | down |
| Cysteineglutathione disulfide                                                     | -13.860 | 3.34x10 <sup>-6</sup> | 1.59x10 <sup>-4</sup> | down |
| Lauroyl-EA                                                                        | -13.832 | 3.39x10 <sup>-6</sup> | 1.59x10 <sup>-4</sup> | down |
| PE(18:1(11Z)/18:3(9Z,12Z,15Z))                                                    | -13.706 | 1.01x10 <sup>-5</sup> | 3.79x10 <sup>-4</sup> | down |
| C11 H19 N O2                                                                      | -13.702 | 3.38x10 <sup>-6</sup> | 1.59x10 <sup>-4</sup> | down |
| PE(O-18:1(9Z)/0:0)                                                                | -13.678 | 1.21x10 <sup>-5</sup> | 4.02x10 <sup>-4</sup> | down |
| ?-Tocotrienol Esi-8.610001                                                        | -13.658 | 1.21x10 <sup>-5</sup> | 4.02x10 <sup>-4</sup> | down |
| C16 H33 N O4                                                                      | -13.632 | 3.65x10 <sup>-6</sup> | 1.62x10 <sup>-4</sup> | down |
| 20,21,21-Trifluoro-3-methoxy-19-nor-17alpha-<br>pregna-1,3,5(10),20-tetraen-17-ol | -13.586 | 3.63x10 <sup>-6</sup> | 1.62x10 <sup>-4</sup> | down |
| C41 H63 N10 O                                                                     | -13.580 | 3.76x10 <sup>-6</sup> | 1.65x10 <sup>-4</sup> | down |
| C29 H31 N8 O3                                                                     | -13.571 | 4.70x10 <sup>-6</sup> | 1.92x10 <sup>-4</sup> | down |
| C47 H67 N4                                                                        | -13.568 | 3.45x10 <sup>-6</sup> | 1.60x10 <sup>-4</sup> | down |
| LysoPE(0:0/20:0)                                                                  | -13.412 | 5.59x10 <sup>-6</sup> | 2.20x10 <sup>-4</sup> | down |
| C8 H20 N12 O2                                                                     | -13.260 | 4.67x10 <sup>-6</sup> | 1.92x10 <sup>-4</sup> | down |
| C13 H29 N8 O2                                                                     | -12.756 | 1.67x10 <sup>-4</sup> | 5.64x10 <sup>-3</sup> | down |
| C26 H33 N10 O2                                                                    | -12.671 | 2.14x10 <sup>-4</sup> | 7.02x10 <sup>-3</sup> | down |
| C43 H53 N6 O2                                                                     | -12.582 | 2.22x10 <sup>-4</sup> | 7.22x10 <sup>-3</sup> | down |
| C30 H47 N10 O3                                                                    | -12.548 | 1.13x10 <sup>-4</sup> | 3.94x10 <sup>-3</sup> | down |
| PS(22:2(13Z,16Z)/18:2(9Z,12Z))                                                    | -12.333 | 7.09x10 <sup>-5</sup> | 2.56x10 <sup>-3</sup> | down |
| TG(16:1(9Z)/16:1(9Z)/18:2(9Z,12Z))[iso3]                                          | -12.317 | 8.49x10 <sup>-5</sup> | 3.04x10 <sup>-3</sup> | down |
| Nafronyl                                                                          | -11.891 | 1.13x10 <sup>-4</sup> | 3.94x10 <sup>-3</sup> | down |

|                                  |         |                       |                       |      |
|----------------------------------|---------|-----------------------|-----------------------|------|
| C29 H44 N21                      | -11.860 | 1.46x10 <sup>-4</sup> | 3.75x10 <sup>-3</sup> | down |
| C42 H67 N2 O2                    | -11.353 | 1.22x10 <sup>-3</sup> | 3.69x10 <sup>-2</sup> | down |
| C29 H35 N7 O3                    | -10.972 | 3.51x10 <sup>-5</sup> | 1.10x10 <sup>-3</sup> | down |
| C33 H14 N5                       | -9.199  | 4.92x10 <sup>-4</sup> | 1.16x10 <sup>-2</sup> | down |
| C25 H47 N O4                     | -3.546  | 9.41x10 <sup>-5</sup> | 3.32x10 <sup>-3</sup> | down |
| PE(18:0/15:0)                    | -3.284  | 2.87x10 <sup>-4</sup> | 9.22x10 <sup>-3</sup> | down |
| PI(18:1(9Z)/0:0)                 | -2.807  | 3.93x10 <sup>-4</sup> | 9.58x10 <sup>-3</sup> | down |
| C11 H15 N O10                    | -2.353  | 5.72x10 <sup>-4</sup> | 1.33x10 <sup>-2</sup> | down |
| C23 H45 N O4                     | -2.283  | 6.10x10 <sup>-4</sup> | 1.90x10 <sup>-2</sup> | down |
| C19 H24 N3 O13                   | -2.185  | 7.90x10 <sup>-4</sup> | 2.44x10 <sup>-2</sup> | down |
| PI(18:0/0:0)                     | -2.172  | 1.25x10 <sup>-3</sup> | 2.77x10 <sup>-2</sup> | down |
| C8 H11 N5 O9                     | -2.136  | 5.32x10 <sup>-4</sup> | 1.68x10 <sup>-2</sup> | down |
| C17 Sphinganine                  | -2.105  | 6.06x10 <sup>-4</sup> | 1.90x10 <sup>-2</sup> | down |
| C30 H49 O7                       | -1.899  | 1.00x10 <sup>-3</sup> | 3.06x10 <sup>-2</sup> | down |
| 5-Oxoavermectin "1a" aglycone    | -1.845  | 1.38x10 <sup>-3</sup> | 4.10x10 <sup>-2</sup> | down |
| C13 H5 N3 O                      | 1.706   | 2.29x10 <sup>-3</sup> | 4.92x10 <sup>-2</sup> | up   |
| C9 H11 O4                        | 1.784   | 1.40x10 <sup>-3</sup> | 4.12x10 <sup>-2</sup> | up   |
| C7 H5 N6 O2                      | 1.791   | 1.13x10 <sup>-3</sup> | 3.44x10 <sup>-2</sup> | up   |
| C4 H6 N6 O4                      | 1.877   | 9.86x10 <sup>-4</sup> | 3.03x10 <sup>-2</sup> | up   |
| C30 H53 O6                       | 1.896   | 1.30x10 <sup>-3</sup> | 3.86x10 <sup>-2</sup> | up   |
| C28 H49 O6                       | 2.311   | 4.28x10 <sup>-4</sup> | 1.36x10 <sup>-2</sup> | up   |
| C12 H13 N3 O5                    | 3.226   | 8.99x10 <sup>-5</sup> | 3.19x10 <sup>-3</sup> | up   |
| C4 H C13 N2 O5 S                 | 3.347   | 3.16x10 <sup>-4</sup> | 7.85x10 <sup>-3</sup> | up   |
| C7 H19 N3 O5 S                   | 3.548   | 6.64x10 <sup>-5</sup> | 2.41x10 <sup>-3</sup> | up   |
| C8 H19 N O6 S                    | 3.974   | 3.46x10 <sup>-5</sup> | 1.27x10 <sup>-3</sup> | up   |
| Dehydroascorbic acid             | 4.890   | 4.31x10 <sup>-5</sup> | 1.31x10 <sup>-3</sup> | up   |
| PG(22:0/18:1(9Z))                | 12.513  | 1.73x10 <sup>-4</sup> | 5.82x10 <sup>-3</sup> | up   |
| C39 H48 N9 O                     | 12.638  | 1.90x10 <sup>-4</sup> | 6.32x10 <sup>-3</sup> | up   |
| 7-keto-stearic acid              | 12.651  | 1.12x10 <sup>-4</sup> | 3.04x10 <sup>-3</sup> | up   |
| C32 H19 N4 O15                   | 12.721  | 1.08x10 <sup>-4</sup> | 2.98x10 <sup>-3</sup> | up   |
| C26 H43 N2                       | 13.166  | 1.40x10 <sup>-4</sup> | 4.76x10 <sup>-3</sup> | up   |
| C22 H40 N24 O2                   | 13.191  | 1.35x10 <sup>-4</sup> | 4.66x10 <sup>-3</sup> | up   |
| C28 H55 N5 O3                    | 13.456  | 1.70x10 <sup>-6</sup> | 1.38x10 <sup>-4</sup> | up   |
| C16 H25 N4 O                     | 13.503  | 1.89x10 <sup>-6</sup> | 1.38x10 <sup>-4</sup> | up   |
| PS(20:4(5Z,8Z,11Z,14Z)/19:0)     | 13.538  | 1.06x10 <sup>-4</sup> | 2.98x10 <sup>-3</sup> | up   |
| C30 H49 N7 O3                    | 13.666  | 9.26x10 <sup>-5</sup> | 2.71x10 <sup>-3</sup> | up   |
| PI(19:1(9Z)/13:0)                | 13.734  | 5.90x10 <sup>-5</sup> | 1.76x10 <sup>-3</sup> | up   |
| C29 H43 N10 O4                   | 13.949  | 1.34x10 <sup>-4</sup> | 3.52x10 <sup>-3</sup> | up   |
| C31 H41 N12                      | 13.997  | 8.55x10 <sup>-6</sup> | 3.32x10 <sup>-4</sup> | up   |
| C20 H42 N2 O2                    | 14.063  | 2.17x10 <sup>-6</sup> | 1.38x10 <sup>-4</sup> | up   |
| C50 H82 N3                       | 14.072  | 3.38x10 <sup>-6</sup> | 1.59x10 <sup>-4</sup> | up   |
| 1-Linoleoyl Glycerol             | 14.078  | 2.60x10 <sup>-6</sup> | 1.44x10 <sup>-4</sup> | up   |
| C39 H70 N10 O3                   | 14.125  | 1.37x10 <sup>-6</sup> | 1.38x10 <sup>-4</sup> | up   |
| C48 H53 N4                       | 14.150  | 5.59x10 <sup>-6</sup> | 2.20x10 <sup>-4</sup> | up   |
| C23 H41 N3 O3                    | 14.177  | 2.17x10 <sup>-6</sup> | 1.38x10 <sup>-4</sup> | up   |
| C27 H50 N13 O4                   | 14.207  | 2.13x10 <sup>-6</sup> | 1.38x10 <sup>-4</sup> | up   |
| PI(16:0/20:5(5Z,8Z,11Z,14Z,17Z)) | 14.418  | 1.25x10 <sup>-6</sup> | 1.38x10 <sup>-4</sup> | up   |
| C34 H43 N11 O                    | 14.437  | 2.14x10 <sup>-6</sup> | 1.38x10 <sup>-4</sup> | up   |

|                                                                                                              |        |                       |                       |    |
|--------------------------------------------------------------------------------------------------------------|--------|-----------------------|-----------------------|----|
| PE(17:0/0:0)                                                                                                 | 14.480 | 1.36x10 <sup>-6</sup> | 1.38x10 <sup>-4</sup> | up |
| MID42466:11?-(4-dimethylaminophenyl)-<br>1?,25-dihydroxyvitamin D3 / 11?-(4-<br>dimethylaminophenyl)-1?,25-d | 14.541 | 1.19x10 <sup>-6</sup> | 1.38x10 <sup>-4</sup> | up |
| C38 H62 N4                                                                                                   | 14.563 | 1.11x10 <sup>-6</sup> | 1.38x10 <sup>-4</sup> | up |
| C33 H20 N9 O12                                                                                               | 14.671 | 7.27x10 <sup>-7</sup> | 5.95x10 <sup>-5</sup> | up |
| C22 H15 N6 O18                                                                                               | 14.689 | 1.24x10 <sup>-6</sup> | 1.38x10 <sup>-4</sup> | up |
| C16 H20 N7 O13 Esi+0.48499998                                                                                | 14.778 | 1.02x10 <sup>-6</sup> | 1.38x10 <sup>-4</sup> | up |
| C19 H41 N                                                                                                    | 14.785 | 1.54x10 <sup>-6</sup> | 1.38x10 <sup>-4</sup> | up |
| C35 H45 N11                                                                                                  | 14.808 | 2.26x10 <sup>-6</sup> | 1.40x10 <sup>-4</sup> | up |
| 4-phenyl-5-methyl-1,2,3-Thiadiazole                                                                          | 14.872 | 1.00x10 <sup>-6</sup> | 1.38x10 <sup>-4</sup> | up |
| C26 H9 N9 O15                                                                                                | 14.880 | 3.41x10 <sup>-7</sup> | 3.84x10 <sup>-5</sup> | up |
| Eicosanoyl-EA                                                                                                | 14.908 | 9.98x10 <sup>-7</sup> | 1.38x10 <sup>-4</sup> | up |
| C29 H45 N7 O                                                                                                 | 14.924 | 1.00x10 <sup>-6</sup> | 1.38x10 <sup>-4</sup> | up |
| PE(13:0/13:0)                                                                                                | 14.935 | 1.19x10 <sup>-6</sup> | 1.38x10 <sup>-4</sup> | up |
| PS(21:0/22:6(4Z,7Z,10Z,13Z,16Z,19Z))                                                                         | 14.992 | 9.46x10 <sup>-4</sup> | 2.13x10 <sup>-2</sup> | up |
| C17 H24 N5 O12                                                                                               | 15.023 | 1.09x10 <sup>-6</sup> | 1.38x10 <sup>-4</sup> | up |
| C31 H29 N4 O6                                                                                                | 15.070 | 1.48x10 <sup>-6</sup> | 1.38x10 <sup>-4</sup> | up |
| C8 N2 O4 S3                                                                                                  | 15.131 | 9.78x10 <sup>-7</sup> | 1.38x10 <sup>-4</sup> | up |
| 3-O-Methylisoproterenol Sulfate                                                                              | 15.168 | 4.70x10 <sup>-7</sup> | 4.59x10 <sup>-5</sup> | up |
| C17 H24 N8 O4                                                                                                | 15.172 | 1.00x10 <sup>-6</sup> | 1.38x10 <sup>-4</sup> | up |
| C17 H18 N12 O6 S                                                                                             | 15.190 | 4.04x10 <sup>-7</sup> | 4.23x10 <sup>-5</sup> | up |
| (Z)-N-(2-hydroxyethyl)hexadec-7-enamide                                                                      | 15.207 | 9.44x10 <sup>-7</sup> | 1.38x10 <sup>-4</sup> | up |
| C11 H13 N8 O2                                                                                                | 15.372 | 9.84x10 <sup>-7</sup> | 1.38x10 <sup>-4</sup> | up |
| C42 H66 N10 O                                                                                                | 15.503 | 1.55x10 <sup>-5</sup> | 5.79x10 <sup>-4</sup> | up |
| C9 H8 N O                                                                                                    | 15.656 | 1.00x10 <sup>-6</sup> | 1.38x10 <sup>-4</sup> | up |
| C8 H17 O9                                                                                                    | 15.658 | 9.30x10 <sup>-7</sup> | 1.38x10 <sup>-4</sup> | up |
| C27 H45 O4                                                                                                   | 15.660 | 7.97x10 <sup>-7</sup> | 1.38x10 <sup>-4</sup> | up |
| C12 H20 N3 O11                                                                                               | 15.665 | 7.90x10 <sup>-7</sup> | 1.38x10 <sup>-4</sup> | up |
| C18 H32 N4 O4                                                                                                | 15.733 | 7.79x10 <sup>-7</sup> | 1.38x10 <sup>-4</sup> | up |
| C18 H29 O15                                                                                                  | 15.807 | 8.64x10 <sup>-7</sup> | 1.38x10 <sup>-4</sup> | up |
| C21 H20 N4 O11                                                                                               | 15.962 | 2.88x10 <sup>-7</sup> | 3.52x10 <sup>-5</sup> | up |
| C6 H9 N2 O5                                                                                                  | 16.085 | 7.97x10 <sup>-7</sup> | 1.38x10 <sup>-4</sup> | up |
| C11 H7 O12                                                                                                   | 16.214 | 2.26x10 <sup>-7</sup> | 3.20x10 <sup>-5</sup> | up |
| C7 H13 N5 O8                                                                                                 | 16.239 | 2.28x10 <sup>-7</sup> | 3.20x10 <sup>-5</sup> | up |
| Lys-Trp-OH                                                                                                   | 16.241 | 6.52x10 <sup>-7</sup> | 1.38x10 <sup>-4</sup> | up |
| C9 H17 N5 O8 S                                                                                               | 16.274 | 5.94x10 <sup>-7</sup> | 5.44x10 <sup>-5</sup> | up |
| C10 H8 N6 S                                                                                                  | 16.293 | 7.19x10 <sup>-7</sup> | 1.38x10 <sup>-4</sup> | up |
| Pyrroline hydroxycarboxylic acid Esi-<br>0.33866668                                                          | 16.496 | 2.23x10 <sup>-7</sup> | 3.20x10 <sup>-5</sup> | up |
| C10 H7 N3                                                                                                    | 16.498 | 9.27x10 <sup>-7</sup> | 1.38x10 <sup>-4</sup> | up |
| C11 H14 N2 O7                                                                                                | 16.560 | 2.40x10 <sup>-7</sup> | 3.20x10 <sup>-5</sup> | up |
| Propionylglycine                                                                                             | 16.612 | 2.14x10 <sup>-7</sup> | 3.20x10 <sup>-5</sup> | up |
| C11 H15 O6                                                                                                   | 16.772 | 1.97x10 <sup>-7</sup> | 3.20x10 <sup>-5</sup> | up |
| C36 H78 N7 O4 S                                                                                              | 16.862 | 7.39x10 <sup>-7</sup> | 1.38x10 <sup>-4</sup> | up |
| C12 H3 N3 O2                                                                                                 | 16.951 | 5.35x10 <sup>-7</sup> | 1.38x10 <sup>-4</sup> | up |
| N-HFG                                                                                                        | 16.954 | 5.65x10 <sup>-7</sup> | 1.38x10 <sup>-4</sup> | up |
| 2-Ketobutyric acid                                                                                           | 17.191 | 1.76x10 <sup>-7</sup> | 3.20x10 <sup>-5</sup> | up |
| C37 H38 O3                                                                                                   | 17.334 | 1.15x10 <sup>-6</sup> | 1.38x10 <sup>-4</sup> | up |

|                                                                                              |        |                       |                       |    |
|----------------------------------------------------------------------------------------------|--------|-----------------------|-----------------------|----|
| C3 H7 N3 O S                                                                                 | 17.801 | 4.43x10 <sup>-7</sup> | 1.38x10 <sup>-4</sup> | up |
| C8 H15 N5 O5 S                                                                               | 17.867 | 1.46x10 <sup>-7</sup> | 3.20x10 <sup>-5</sup> | up |
| Glutaryl glycine                                                                             | 17.944 | 1.46x10 <sup>-7</sup> | 3.20x10 <sup>-5</sup> | up |
| C10 H19 N O4                                                                                 | 17.974 | 4.05x10 <sup>-7</sup> | 1.38x10 <sup>-4</sup> | up |
| C4 H2 O8 S2                                                                                  | 18.086 | 3.94x10 <sup>-7</sup> | 1.38x10 <sup>-4</sup> | up |
| Taurine                                                                                      | 18.304 | 1.47x10 <sup>-7</sup> | 3.20x10 <sup>-5</sup> | up |
| 5-Hydroxy-2,4-dioxopentanoate                                                                | 18.314 | 1.33x10 <sup>-7</sup> | 3.20x10 <sup>-5</sup> | up |
| Tuberonic acid glucoside                                                                     | 18.427 | 3.61x10 <sup>-7</sup> | 1.38x10 <sup>-4</sup> | up |
| 1-(10-methyl-hexadecanoyl)-2-(8-[3]-<br>ladderane-octanyl)-sn-<br>glycerophosphoethanolamine | 18.586 | 3.61x10 <sup>-7</sup> | 1.38x10 <sup>-4</sup> | up |
| C8 H7 N2                                                                                     | 18.707 | 3.41x10 <sup>-7</sup> | 1.38x10 <sup>-4</sup> | up |
| L-Isoleucine                                                                                 | 19.256 | 1.74x10 <sup>-6</sup> | 1.38x10 <sup>-4</sup> | up |

---
